# Supplementary material for: Why do animal eyes have pupils of different shapes?
Source: PubMed Central journal article supplement — Sci Adv. 2015 Aug 7;1(7):e1500391. doi: 10.1126/sciadv.1500391 (PMC4643806; doi:10.1126/sciadv.1500391), 2015-08-07
Supplement: 1500391_SM.pdf [file 1500391_SM.pdf]

## Supplementary Materials for

### **Why do animal eyes have pupils of different shapes?**

Martin S. Banks, William W. Sprague, Jürgen Schmoll, Jared A. Q. Parnell, Gordon D. Love

Published 7 August 2015, *Sci. Adv.* **1**, e1500391 (2015)

DOI: 10.1126/sciadv.1500391

#### **The PDF file includes:**

Fig. S1. Interactive version of database.

Fig. S2. Photographs of eye rotation and head pitch in the horse.

Movie S1. Video of eye rotation with head pitch in sheep.

Table S1. List of species.

Table S2. Number of species in each category.

Table S3. Relative-risk ratios with horizontal pupil as reference.

Table S4. Statistical significance of relationships between ecological niche and pupil shape for Felids and Canids with phylogenetic relatedness taken into account.

Movie S2. Video showing changes in image properties for different amounts of defocus and pupil orientations.

#### **Other Supplementary Material for this manuscript includes the following:**

(available at [www.advances.sciencemag.org/cgi/content/full/1/7/e1500391/DC1](http://www.advances.sciencemag.org/cgi/content/full/1/7/e1500391/DC1))

Movie S1 (.mov format). Video of eye rotation with head pitch in sheep.

Movie S2 (.mp4 format). Video showing changes in image properties for different amounts of defocus and pupil orientations.

# Supplementary Figures

## Figure S1

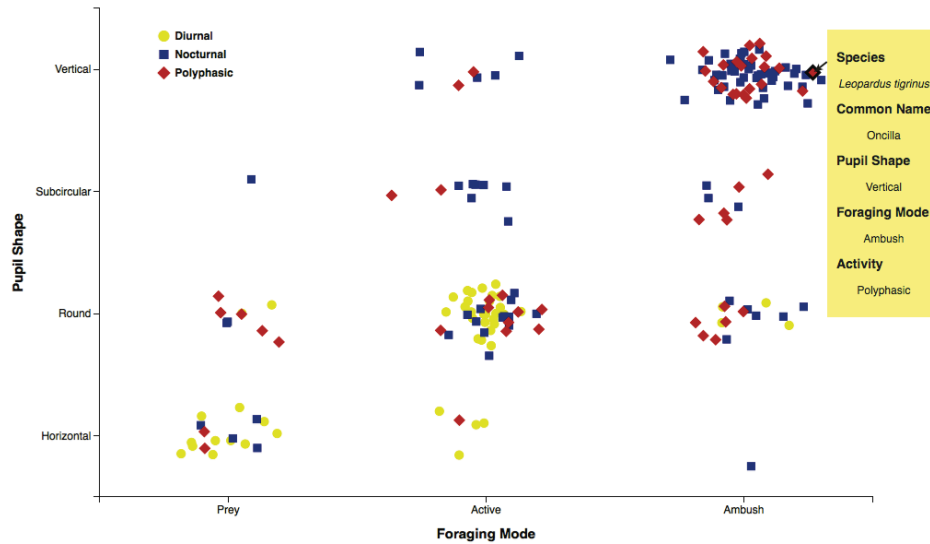

**Figure S1.** Interactive version of database. The graph above is a screen shot with low resolution. Go to <http://pupils.bankslab.org/> to view the interactive version. Pupil shape (vertically elongated, sub-circular, circular, and horizontally elongated) is plotted as a function of foraging mode (herbivorous prey, active predator, and ambush predator). Each dot represents a species; yellow, red, and blue represent diurnal, polyphasic, and nocturnal, respectively. Diurnal, polyphasic, and nocturnal mean respectively primarily active during the day, active during the day and night, and active at night. The dots in each bin have been randomly offset to avoid overlap. Move the cursor over a dot and a panel appears stating the species, common name, pupil shape, foraging mode, and diel activity. Click on the dot and a web resource appears with pictures of the species.

Figure S2

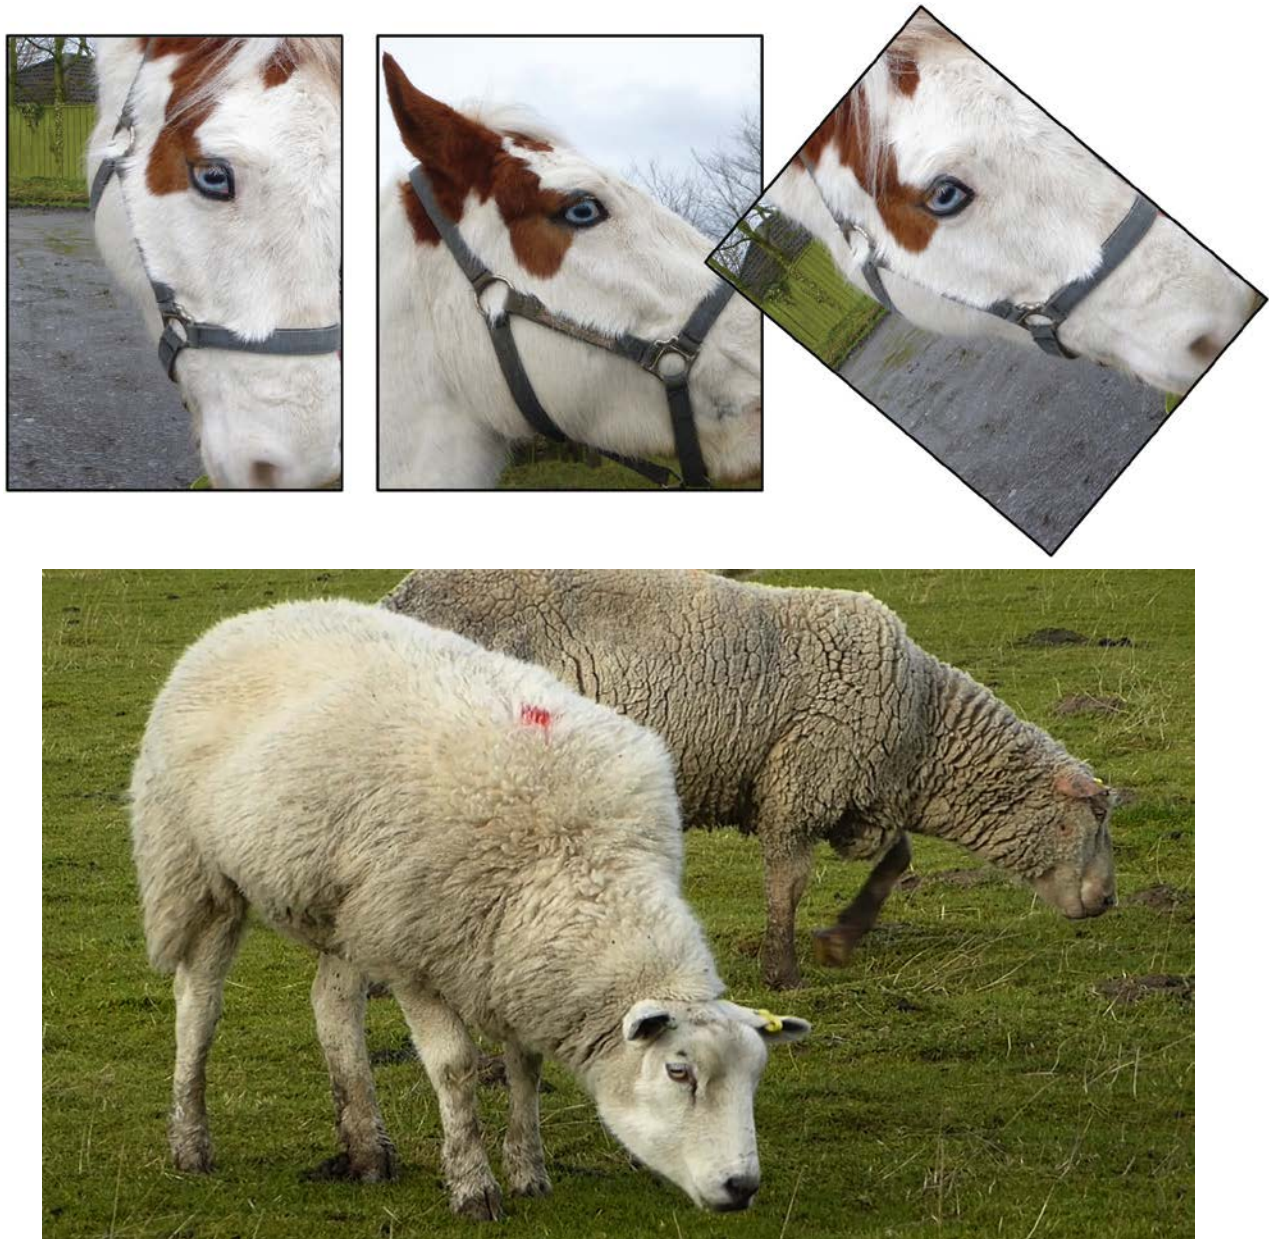

**Figure S2.** Eye rotation with head pitch. Upper panels: Photographs of a horse with the head pitched down (left) and up (middle). Note that the eye rotates counter-clockwise from the left to the middle photograph thereby maintaining rough alignment with earth horizontal. The right panel is the same as the left but with the photograph rotated so that the head is in roughly the same orientation as in the middle panel. Note that the eye is no longer in the same orientation as in the middle panel again because it has rotated counter-clockwise when the animal pitched its head down to graze.

**Movie S1.** Video showing sheep changing head pitch. Again the eye undergoes a torsional movement such that the pupil's long axis maintains rough alignment with earth horizontal.

Table S1: List of species

| <b>Species</b>                   | <b>Common Name</b> | <b>Diel Activity</b> | <b>Foraging Mode</b> | <b>Pupil Shape</b> |
|----------------------------------|--------------------|----------------------|----------------------|--------------------|
| <i>Acanthophis antarcticus</i>   | Common death adder | Polyphasic           | Ambush               | Vertical           |
| <i>Acanthophis hawkei</i>        | Not found          | Polyphasic           | Ambush               | Vertical           |
| <i>Acanthophis praelongus</i>    | Not found          | Nocturnal            | Ambush               | Vertical           |
| <i>Acanthophis pyrrhus</i>       | Desert death adder | Nocturnal            | Ambush               | Vertical           |
| <i>Acanthophis rugosus</i>       | Not found          | Polyphasic           | Ambush               | Vertical           |
| <i>Acanthophis wellsi</i>        | Not found          | Polyphasic           | Ambush               | Vertical           |
| <i>Acrochordus arafuræ</i>       | Not found          | Nocturnal            | Active               | Circular           |
| <i>Antaresia childreni</i>       | Children's python  | Nocturnal            | Ambush               | Vertical           |
| <i>Antaresia maculosa</i>        | Not found          | Nocturnal            | Ambush               | Vertical           |
| <i>Antaresia perthensis</i>      | Not found          | Nocturnal            | Ambush               | Vertical           |
| <i>Antaresia stimsoni</i>        | Not found          | Nocturnal            | Ambush               | Vertical           |
| <i>Aspidites melanocephalus</i>  | Not found          | Nocturnal            | Ambush               | Vertical           |
| <i>Aspidites ramsayi</i>         | Not found          | Nocturnal            | Ambush               | Vertical           |
| <i>Austrelaps ramsayi</i>        | Not found          | Diurnal              | Active               | Circular           |
| <i>Austrelaps superbus</i>       | Lowland copperhead | Diurnal              | Active               | Circular           |
| <i>Cacophis harriettae</i>       | Not found          | Nocturnal            | Active               | Subcircular        |
| <i>Demansia angusticeps</i>      | Not found          | Diurnal              | Active               | Circular           |
| <i>Demansia calodera</i>         | Not found          | Diurnal              | Active               | Circular           |
| <i>Demansia olivacea</i>         | Not found          | Diurnal              | Active               | Circular           |
| <i>Demansia papuensis</i>        | Not found          | Diurnal              | Active               | Circular           |
| <i>Demansia psammophis</i>       | Not found          | Diurnal              | Active               | Circular           |
| <i>Demansia quaesitor</i>        | Not found          | Diurnal              | Active               | Circular           |
| <i>Demansia rimicola</i>         | Not found          | Diurnal              | Active               | Circular           |
| <i>Demansia rufescens</i>        | Not found          | Diurnal              | Active               | Circular           |
| <i>Demansia simplex</i>          | Not found          | Diurnal              | Active               | Circular           |
| <i>Demansia torquata</i>         | Not found          | Diurnal              | Active               | Circular           |
| <i>Demansia vestigiata</i>       | Not found          | Diurnal              | Active               | Circular           |
| <i>Dendrelaphis punctulata</i>   | Not found          | Diurnal              | Active               | Circular           |
| <i>Denisonia devisi</i>          | Mud adder          | Nocturnal            | Ambush               | Subcircular        |
| <i>Denisonia maculata</i>        | Ornamental snake   | Nocturnal            | Ambush               | Subcircular        |
| <i>Drysdalia coronoides</i>      | White-lipped snake | Polyphasic           | Active               | Circular           |
| <i>Drysdalia mastersii</i>       | Not found          | Nocturnal            | Active               | Circular           |
| <i>Drysdalia rhodogaster</i>     | Not found          | Nocturnal            | Active               | Circular           |
| <i>Echiopsis curta</i>           | Not found          | Nocturnal            | Ambush               | Subcircular        |
| <i>Elapognathus coronata</i>     | Not found          | Polyphasic           | Active               | Circular           |
| <i>Elapognathus minor</i>        | Short-nosed snake  | Nocturnal            | Active               | Circular           |
| <i>Furina barnardi</i>           | Not found          | Nocturnal            | Active               | Subcircular        |
| <i>Furina diadema</i>            | Not found          | Nocturnal            | Active               | Subcircular        |
| <i>Furina ornata</i>             | Not found          | Nocturnal            | Active               | Subcircular        |
| <i>Furina tristis</i>            | Not found          | Nocturnal            | Active               | Subcircular        |
| <i>Hemiaspis damelii</i>         | Not found          | Nocturnal            | Active               | Circular           |
| <i>Hemiaspis signata</i>         | Not found          | Polyphasic           | Active               | Circular           |
| <i>Hoplocephalus bitorquatus</i> | Not found          | Nocturnal            | Ambush               | Circular           |
| <i>Hoplocephalus bungaroides</i> | Broad-headed snake | Nocturnal            | Ambush               | Circular           |
| <i>Hoplocephalus stephensii</i>  | Not found          | Nocturnal            | Ambush               | Circular           |
| <i>Liasis fuscus</i>             | Not found          | Nocturnal            | Ambush               | Vertical           |
| <i>Liasis olivaceus</i>          | Not found          | Nocturnal            | Ambush               | Vertical           |

|                                 |                         |            |        |             |
|---------------------------------|-------------------------|------------|--------|-------------|
| <i>Morelia amethystina</i>      | Not found               | Nocturnal  | Ambush | Vertical    |
| <i>Morelia bredli</i>           | Not found               | Nocturnal  | Ambush | Vertical    |
| <i>Morelia carinata</i>         | Not found               | Nocturnal  | Ambush | Vertical    |
| <i>Morelia oenpelliensis</i>    | Not found               | Nocturnal  | Ambush | Vertical    |
| <i>Morelia spilota</i>          | Not found               | Nocturnal  | Ambush | Vertical    |
| <i>Morelia viridis</i>          | Not found               | Nocturnal  | Ambush | Vertical    |
| <i>Notechis scutatus</i>        | Tiger snake             | Diurnal    | Active | Circular    |
| <i>Oxyuranus microlepidotus</i> | Inland taipan           | Diurnal    | Active | Circular    |
| <i>Oxyuranus scutellatus</i>    | Coastal taipan          | Diurnal    | Active | Circular    |
| <i>Pseudechis australis</i>     | Not found               | Polyphasic | Active | Circular    |
| <i>Pseudechis butleri</i>       | Not found               | Nocturnal  | Active | Circular    |
| <i>Pseudechis colletti</i>      | Collett's snake         | Nocturnal  | Active | Circular    |
| <i>Pseudechis guttatus</i>      | Not found               | Diurnal    | Active | Circular    |
| <i>Pseudechis porphyriacus</i>  | Red-bellied black snake | Diurnal    | Active | Circular    |
| <i>Pseudonaja nuchalis</i>      | Not found               | Polyphasic | Active | Circular    |
| <i>Pseudonaja textilis</i>      | Eastern brown snake     | Diurnal    | Active | Circular    |
| <i>Simoselaps approximans</i>   | Not found               | Nocturnal  | Active | Circular    |
| <i>Simoselaps australis</i>     | Not found               | Nocturnal  | Active | Circular    |
| <i>Simoselaps bertholdi</i>     | Not found               | Polyphasic | Active | Subcircular |
| <i>Simoselaps fasciolatus</i>   | Not found               | Nocturnal  | Active | Subcircular |
| <i>Simoselaps littoralis</i>    | Not found               | Polyphasic | Active | Subcircular |
| <i>Suta suta</i>                | Not found               | Nocturnal  | Active | Subcircular |
| <i>Tropidechis carinatus</i>    | Not found               | Polyphasic | Active | Circular    |
| <i>Tropidonophis mairii</i>     | Not found               | Nocturnal  | Active | Circular    |
| <i>Felis catus</i>              | Domestic cat            | Polyphasic | Ambush | Vertical    |
| <i>Felis silvestris</i>         | Wildcat                 | Polyphasic | Ambush | Vertical    |
| <i>Felis libyca</i>             | African wildcat         | Polyphasic | Ambush | Vertical    |
| <i>Felis bieti</i>              | Chinese mountain cat    | Nocturnal  | Ambush | Vertical    |
| <i>Felis margarita</i>          | Sand cat                | Nocturnal  | Ambush | Vertical    |
| <i>Felis nigripes</i>           | Blackfooted cat         | Nocturnal  | Ambush | Vertical    |
| <i>Felis chaus</i>              | Jungle cat              | Polyphasic | Ambush | Vertical    |
| <i>Otocolobus manul</i>         | Pallas' cat             | Polyphasic | Ambush | Circular    |
| <i>Prionailurus rubiginosus</i> | Rusty-spotted cat       | Nocturnal  | Ambush | Vertical    |
| <i>Prionailurus bengalensis</i> | Leopard cat             | Polyphasic | Ambush | Vertical    |
| <i>Prionailurus viverrinus</i>  | Fishing cat             | Nocturnal  | Ambush | Vertical    |
| <i>Prionailurus planiceps</i>   | Flat-headed cat         | Polyphasic | Ambush | Vertical    |
| <i>Puma concolor</i>            | Cougar                  | Nocturnal  | Ambush | Circular    |
| <i>Puma yagouaroundi</i>        | Jaguarundi              | Diurnal    | Ambush | Circular    |
| <i>Acinonyx jubatus</i>         | Cheetah                 | Diurnal    | Active | Circular    |
| <i>Lynx pardinus</i>            | Iberian lynx            | Polyphasic | Ambush | Subcircular |
| <i>Lynx lynx</i>                | Lynx                    | Polyphasic | Ambush | Subcircular |
| <i>Lynx canadensis</i>          | Canada lynx             | Polyphasic | Ambush | Subcircular |
| <i>Lynx rufus</i>               | Bobcat                  | Polyphasic | Ambush | Subcircular |
| <i>Leopardus pardalis</i>       | Ocelot                  | Nocturnal  | Ambush | Vertical    |
| <i>Leopardus wiedii</i>         | Margay                  | Nocturnal  | Ambush | Vertical    |
| <i>Leopardus braccatus</i>      | Pantanal cat            | Polyphasic | Ambush | Vertical    |
| <i>Leopardus colocolo</i>       | Colocolo                | Polyphasic | Ambush | Vertical    |
| <i>Leopardus geoffroyi</i>      | Geoffroy's cat          | Nocturnal  | Ambush | Vertical    |
| <i>Leopardus guigna</i>         | Kodkod                  | Polyphasic | Ambush | Vertical    |
| <i>Leopardus tigrinus</i>       | Oncilla                 | Polyphasic | Ambush | Vertical    |

|                                 |                         |            |             |             |
|---------------------------------|-------------------------|------------|-------------|-------------|
| <i>Caracal caracal</i>          | Caracal                 | Polyphasic | Ambush      | Subcircular |
| <i>Caracal aurata</i>           | African golden cat      | Polyphasic | Ambush      | Vertical    |
| <i>Caracal serval</i>           | Serval                  | Nocturnal  | Ambush      | Vertical    |
| <i>Pardofelis temminckii</i>    | Asian golden cat        | Diurnal    | Ambush      | Circular    |
| <i>Pardofelis marmorata</i>     | Marbled cat             | Nocturnal  | Ambush      | Vertical    |
| <i>Panthera leo</i>             | Lion                    | Nocturnal  | Ambush      | Circular    |
| <i>Panthera onca</i>            | Jaguar                  | Polyphasic | Ambush      | Circular    |
| <i>Panthera pardus</i>          | Leopard                 | Polyphasic | Ambush      | Circular    |
| <i>Panthera tigris</i>          | Tiger                   | Nocturnal  | Ambush      | Circular    |
| <i>Panthera uncia</i>           | Snow leopard            | Polyphasic | Ambush      | Circular    |
| <i>Neofelis nebulosa</i>        | Clouded leopard         | Nocturnal  | Ambush      | Vertical    |
| <i>Crocuta crocuta</i>          | Spotted hyena           | Nocturnal  | Active      | Vertical    |
| <i>Genetta genetta</i>          | Common genet            | Nocturnal  | Ambush      | Vertical    |
| <i>Canis lupus</i>              | Gray wolf               | Nocturnal  | Active      | Circular    |
| <i>Canis latrans</i>            | Coyote                  | Diurnal    | Active      | Circular    |
| <i>Canis simensis</i>           | Ethiopian wolf          | Polyphasic | Active      | Circular    |
| <i>Canis aureus</i>             | Golden jackal           | Polyphasic | Active      | Circular    |
| <i>Canis adustus</i>            | Side-striped jackal     | Nocturnal  | Active      | Circular    |
| <i>Canis mesomelas</i>          | Black-backed jackal     | Nocturnal  | Active      | Circular    |
| <i>Cuon alpinus</i>             | Dhole                   | Diurnal    | Active      | Circular    |
| <i>Lycaon pictus</i>            | African wild dog        | Polyphasic | Active      | Circular    |
| <i>Cerdocyon thous</i>          | Crab-eating fox         | Nocturnal  | Ambush      | Vertical    |
| <i>Lycalopex culpaeus</i>       | Culpeo                  | Polyphasic | Ambush      | Vertical    |
| <i>Lycalopex fulvipes</i>       | Darwin's fox            | Polyphasic | Active      | Vertical    |
| <i>Lycalopex griseus</i>        | South american gray fox | Nocturnal  | Ambush      | Vertical    |
| <i>Lycalopex gymnocercus</i>    | Pampas fox              | Nocturnal  | Ambush      | Vertical    |
| <i>Lycalopex sechurae</i>       | Sechuran fox            | Nocturnal  | Ambush      | Vertical    |
| <i>Lycalopex vetulus</i>        | Hoary fox               | Nocturnal  | Active      | Vertical    |
| <i>Chrysocyon brachyurus</i>    | Maned wolf              | Polyphasic | Ambush      | Circular    |
| <i>Speothos venaticus</i>       | Bush dog                | Diurnal    | Active      | Circular    |
| <i>Vulpes lagopus</i>           | Arctic fox              | Polyphasic | Ambush      | Vertical    |
| <i>Vulpes vulpes</i>            | Red fox                 | Polyphasic | Ambush      | Vertical    |
| <i>Vulpes velox</i>             | Swift fox               | Nocturnal  | Ambush      | Vertical    |
| <i>Vulpes macrotis</i>          | Kit fox                 | Nocturnal  | Ambush      | Vertical    |
| <i>Vulpes corsac</i>            | Corsac fox              | Nocturnal  | Ambush      | Vertical    |
| <i>Vulpes chama</i>             | Chama fox               | Nocturnal  | Ambush      | Vertical    |
| <i>Vulpes pallida</i>           | Pale fox                | Nocturnal  | Ambush      | Vertical    |
| <i>Vulpes bengalensis</i>       | Bengal fox              | Polyphasic | Ambush      | Vertical    |
| <i>Vulpes cana</i>              | Blanford's fox          | Nocturnal  | Ambush      | Vertical    |
| <i>Vulpes rueppelli</i>         | Rueppell's fox          | Nocturnal  | Ambush      | Vertical    |
| <i>Vulpes zerda</i>             | Fennec fox              | Nocturnal  | Active      | Vertical    |
| <i>Urocyon cinereoargenteus</i> | Gray fox                | Nocturnal  | Ambush      | Vertical    |
| <i>Urocyon littoralis</i>       | Island fox              | Polyphasic | Active      | Vertical    |
| <i>Otocyon megalotis</i>        | Bat-eared fox           | Nocturnal  | Active      | Vertical    |
| <i>Nyctereutes procyonoides</i> | Raccoon dog             | Nocturnal  | Ambush      | Vertical    |
| <i>Bassaricyon gabbi</i>        | Northern olingo         | Nocturnal  | Herbivorous | Horizontal  |
| <i>Cryptoprocta ferox</i>       | Fossa                   | Polyphasic | Ambush      | Vertical    |
| <i>Fossa fossana</i>            | Malagasy civet          | Nocturnal  | Active      | Vertical    |
| <i>Galidia elegans</i>          | Ring-tailed mongoose    | Diurnal    | Active      | Horizontal  |
| <i>Suricata suricatta</i>       | Meerkat                 | Diurnal    | Active      | Horizontal  |

|                                 |                           |            |             |             |
|---------------------------------|---------------------------|------------|-------------|-------------|
| <i>Herpestes auropunctatus</i>  | Small asian mongoose      | Diurnal    | Active      | Horizontal  |
| <i>Helogale parvula</i>         | Common dwarf mongoose     | Diurnal    | Active      | Horizontal  |
| <i>Cynictis penicillata</i>     | Yellow mongoose           | Polyphasic | Active      | Horizontal  |
| <i>Paracynictis selousi</i>     | Selous' mongoose          | Nocturnal  | Ambush      | Horizontal  |
| <i>Ailurus fulgens</i>          | Red panda                 | Polyphasic | Herbivorous | Subcircular |
| <i>Camelus bactrianus</i>       | Bactrian camel            | Diurnal    | Herbivorous | Horizontal  |
| <i>Camelus dromedarius</i>      | Dromedary                 | Diurnal    | Herbivorous | Horizontal  |
| <i>Lama glama</i>               | Llama                     | Diurnal    | Herbivorous | Horizontal  |
| <i>Lama guanicoe</i>            | Guanaco                   | Diurnal    | Herbivorous | Horizontal  |
| <i>Vicugna pacos</i>            | Alpaca                    | Diurnal    | Herbivorous | Horizontal  |
| <i>Vicugna vicugna</i>          | Vicuna                    | Diurnal    | Herbivorous | Horizontal  |
| <i>Hippopotamus amphibius</i>   | Hippopotamus              | Nocturnal  | Herbivorous | Horizontal  |
| <i>Hexaprotodon liberiensis</i> | Pygmy hippopotamus        | Nocturnal  | Herbivorous | Horizontal  |
| <i>Equus ferus</i>              | Horse                     | Diurnal    | Herbivorous | Horizontal  |
| <i>Equus africanus</i>          | Donkey                    | Diurnal    | Herbivorous | Horizontal  |
| <i>Equus quaga</i>              | Plains zebra              | Diurnal    | Herbivorous | Horizontal  |
| <i>Okapia johnstoni</i>         | Okapi                     | Diurnal    | Herbivorous | Horizontal  |
| <i>Giraffa camelopardalis</i>   | Giraffe                   | Polyphasic | Herbivorous | Horizontal  |
| <i>Odocoileus virginianus</i>   | White-tailed deer         | Polyphasic | Herbivorous | Horizontal  |
| <i>Gazella dorcas</i>           | Dorcas gazelle            | Nocturnal  | Herbivorous | Horizontal  |
| <i>Tapirus terrestris</i>       | Brazilian tapir           | Polyphasic | Herbivorous | Circular    |
| <i>Tapirus indicus</i>          | Malayan tapir             | Nocturnal  | Herbivorous | Circular    |
| <i>Tapirus bairdii</i>          | Baird's tapir             | Nocturnal  | Herbivorous | Circular    |
| <i>Tapirus pinchaque</i>        | Mountain tapir            | Polyphasic | Herbivorous | Circular    |
| <i>Ceratotherium simum</i>      | White rhinoceros          | Polyphasic | Herbivorous | Circular    |
| <i>Diceros bicornis</i>         | Black rhinoceros          | Polyphasic | Herbivorous | Circular    |
| <i>Rhinoceros unicornis</i>     | Indian rhinoceros         | Polyphasic | Herbivorous | Circular    |
| <i>Loxodonta africana</i>       | African elephant          | Diurnal    | Herbivorous | Circular    |
| <i>Elephas maximus</i>          | Asian elephant            | Diurnal    | Herbivorous | Circular    |
| <i>Connochaetes taurinus</i>    | Common wildebeest         | Diurnal    | Herbivorous | Horizontal  |
| <i>Bison Bison</i>              | American bison            | Diurnal    | Herbivorous | Horizontal  |
| <i>Bison Bonasus</i>            | European bison            | Diurnal    | Herbivorous | Horizontal  |
| <i>Litocranius walleri</i>      | Gerenuk                   | Diurnal    | Herbivorous | Horizontal  |
| <i>Ourebia ourebi</i>           | Oribi                     | Polyphasic | Herbivorous | Horizontal  |
| <i>Raphicerus campestris</i>    | Steenbok                  | Diurnal    | Herbivorous | Horizontal  |
| <i>Procapra gutturosa</i>       | Mongolian gazelle         | Polyphasic | Herbivorous | Horizontal  |
| <i>Oreotragus oreotragus</i>    | Klipspringer              | Polyphasic | Herbivorous | Horizontal  |
| <i>Redunca redunca</i>          | Bohor reedbuck            | Nocturnal  | Herbivorous | Horizontal  |
| <i>Pelea capreolus</i>          | Grey rhebok               | Diurnal    | Herbivorous | Horizontal  |
| <i>Cervus elaphus</i>           | Red deer                  | Polyphasic | Herbivorous | Horizontal  |
| <i>Pudu mephistophiles</i>      | Pudu                      | Polyphasic | Herbivorous | Horizontal  |
| <i>Mazama gouazoubira</i>       | Gray brocket              | Polyphasic | Herbivorous | Horizontal  |
| <i>Tragulid napu</i>            | Greater mouse-deer        | Nocturnal  | Herbivorous | Horizontal  |
| <i>Hyemoschus aquaticus</i>     | Water chevrotain          | Nocturnal  | Herbivorous | Horizontal  |
| <i>Tragulid javanicus</i>       | Java mouse-deer           | Nocturnal  | Herbivorous | Horizontal  |
| <i>Procapra capensis</i>        | Rock hyrax                | Polyphasic | Herbivorous | Horizontal  |
| <i>Heterohyrax brucei</i>       | Yellow-spotted rock hyrax | Diurnal    | Herbivorous | Horizontal  |
| <i>Equus zebra</i>              | Mountain zebra            | Diurnal    | Herbivorous | Horizontal  |
| <i>Equus hemionus</i>           | Onager                    | Polyphasic | Herbivorous | Horizontal  |
| <i>Cynomys ludovicianus</i>     | Black-tailed prairie dog  | Diurnal    | Herbivorous | Circular    |

|                                   |                            |            |             |             |
|-----------------------------------|----------------------------|------------|-------------|-------------|
| <i>Tamias striatus</i>            | Eastern chipmunk           | Diurnal    | Herbivorous | Circular    |
| <i>Sus scrofa</i>                 | Wild boar                  | Polyphasic | Herbivorous | Circular    |
| <i>Sus barbatus</i>               | Bornean bearded pig        | Diurnal    | Herbivorous | Circular    |
| <i>Chrysemys picta</i>            | Painted turtle             | Diurnal    | Active      | Circular    |
| <i>Pseudemys alabamensis</i>      | Alabama red-bellied cooter | Diurnal    | Active      | Circular    |
| <i>Alligator mississippiensis</i> | American alligator         | Nocturnal  | Ambush      | Vertical    |
| <i>Crocodylus porosus</i>         | Saltwater crocodile        | Nocturnal  | Ambush      | Vertical    |
| <i>Sphenodon punctatus</i>        | Northern tuatara           | Nocturnal  | Ambush      | Vertical    |
| <i>Gekko gekko</i>                | Tokay gecko                | Nocturnal  | Ambush      | Vertical    |
| <i>Iguana Iguana</i>              | Green iguana               | Nocturnal  | Herbivorous | Subcircular |
| <i>Xenosaurus Grandis</i>         | Knob-scaled lizard         | Diurnal    | Ambush      | Circular    |
| <i>Agkistrodon piscivorus</i>     | Cottonmouth                | Polyphasic | Ambush      | Vertical    |
| <i>Coluber constrictor</i>        | Yellow-bellied racer       | Diurnal    | Ambush      | Circular    |
| <i>Boa constrictor</i>            | Boa constrictor            | Nocturnal  | Ambush      | Vertical    |
| <i>Pituophis catenifer</i>        | Western gopher snake       | Diurnal    | Active      | Circular    |
| <i>Sistrurus catenatus</i>        | Massasauga rattlesnake     | Polyphasic | Ambush      | Vertical    |
| <i>Thamnophis sirtalis</i>        | Common garter snake        | Polyphasic | Ambush      | Circular    |



Table S2: Number of species in each category

|                   | <b>Pupil Shape</b>   | <i>horizontal</i> | <i>circular</i> | <i>sub-circular</i> | <i>vertical</i> | <i>all</i> |
|-------------------|----------------------|-------------------|-----------------|---------------------|-----------------|------------|
| <b>Activity</b>   | <b>Foraging Mode</b> |                   |                 |                     |                 |            |
| <i>diurnal</i>    | <i>herbivorous</i>   | 18                | 5               | 0                   | 0               | 23         |
|                   | <i>active</i>        | 4                 | 27              | 0                   | 0               | 31         |
|                   | <i>ambush</i>        | 0                 | 4               | 0                   | 0               | 4          |
| <i>polyphasic</i> | <i>herbivorous</i>   | 10                | 6               | 1                   | 0               | 17         |
|                   | <i>active</i>        | 1                 | 9               | 2                   | 2               | 14         |
|                   | <i>ambush</i>        | 0                 | 6               | 5                   | 22              | 33         |
| <i>nocturnal</i>  | <i>herbivorous</i>   | 8                 | 2               | 1                   | 0               | 11         |
|                   | <i>active</i>        | 0                 | 13              | 7                   | 5               | 25         |
|                   | <i>ambush</i>        | 1                 | 6               | 3                   | 46              | 56         |
| <i>all</i>        |                      | 42                | 78              | 19                  | 75              | 214        |

**Table S2.** The number of species in each category, where the categories are diel activity, foraging mode, and pupil shape.

Table S3. Relative-risk ratios with horizontal pupil as reference

|                 |                    | <b>Pupil Shape</b>             | <i>circular</i> | <i>sub-circular</i> | <i>vertical</i> |
|-----------------|--------------------|--------------------------------|-----------------|---------------------|-----------------|
| <b>Constant</b> | <b>Subset</b>      | <b>Comparison</b>              |                 |                     |                 |
| Activity        | <i>diurnal</i>     | <i>herbivorous to active</i>   | 24.3            | 4.50                | 4.50            |
|                 |                    | <i>active to ambush</i>        | 5926            | 40001               | 40001           |
|                 | <i>polyphasic</i>  | <i>herbivorous to active</i>   | 15              | 20                  | 2.00E+05        |
|                 |                    | <i>active to ambush</i>        | 6667            | 25002               | 1.10E+05        |
|                 | <i>nocturnal</i>   | <i>herbivorous to active</i>   | 5.20E+05        | 5.60E+05            | 4.00E+09        |
|                 |                    | <i>active to ambush</i>        | 0               | 0                   | 0               |
| Foraging Mode   | <i>herbivorous</i> | <i>diurnal to polyphasic</i>   | 2.16            | 18002               | 1.80            |
|                 |                    | <i>polyphasic to nocturnal</i> | 0.417           | 1.25                | 1.25            |
|                 | <i>active</i>      | <i>diurnal to polyphasic</i>   | 1.33            | 79998               | 79998           |
|                 |                    | <i>polyphasic to nocturnal</i> | 14446           | 35002               | 25002           |
|                 | <i>ambush</i>      | <i>diurnal to polyphasic</i>   | 1.50            | 50001               | 2.20E+05        |
|                 |                    | <i>polyphasic to nocturnal</i> | 0               | 0                   | 0               |

**Table S3.** Relative-risk ratios with horizontal pupil as the reference. Relative risk ( $RR$ ) is a measure of how likely a particular pupil shape is relative to horizontally elongated:

$$RR(PupilShape, a_i, f_j) = \frac{p(PupilShape | a_i, f_j)}{p(HorizPupil | a_i, f_j)}$$

where  $a_i$  is the  $i$ -th diel activity ( $i = 1$  is diurnal, 2 polyphasic, 3 nocturnal) and  $f_j$  is the  $j$ -th foraging mode (1 is prey, 2 active predator, 3 ambush predator). The denominator was sometimes zero. To avoid divide by zero, we added an increment of  $10^{-4}$  to the numerator and denominator. Relative-risk ratio ( $RRR$ ) is a measure of how the probability of having a particular pupil shape changes as activity or foraging mode is incremented from one value to the next. When incrementing foraging mode, the ratio is:

$$RRR(PupilShape, a_i, f_{j+1}) = \frac{RR(PupilShape, a_i, f_{j+1})}{RR(PupilShape, a_i, f_j)}$$

The values in the table are  $RRR$ . The pink boxes indicate values that were significantly affected by the increment of  $10^{-4}$ . They are all cases where the relative-risk ratio is much greater than 1.

Table S4: Niche and pupil shape for Felids and Canids

|                   |                 | <b>Felids</b> |          | <b>Canids</b> |          |
|-------------------|-----------------|---------------|----------|---------------|----------|
| Sub-circular with | Polyphasic with | Activity      | Foraging | Activity      | Foraging |
| circular          | diurnal         | p<0.07        | p=0.722  | p<0.04        | p<0.0001 |
| circular          | nocturnal       | p<0.03        | p=0.722  | p<0.005       | p<0.0001 |
| vertical slit     | diurnal         | p=0.239       | p<0.14   | p<0.04        | p<0.0001 |
| vertical slit     | nocturnal       | p<0.001       | p<0.14   | p<0.006       | p<0.0001 |

**Table S4.** Statistical significance of relationships between ecological niche and pupil shape for Felids and Canids with phylogenetic relatedness taken into account. The data from the Felid and Canid families for which ancestral trees were known were subjected to Pagel's correlation analysis (52-54). There were three pupil values (circular, sub-circular, and vertical), three diel activities (diurnal, polyphasic, and nocturnal), and two foraging modes (active predator and ambush predator). The categories with three values were binarized for the analysis. We therefore created two pairs for the two traits with three values: for pupils, sub-circular with circular and sub-circular with vertical slit; for activity, polyphasic with diurnal and polyphasic with nocturnal. Those yielded four combinations of pairings that yielded in turn four significance values as shown above.

## Movie S2

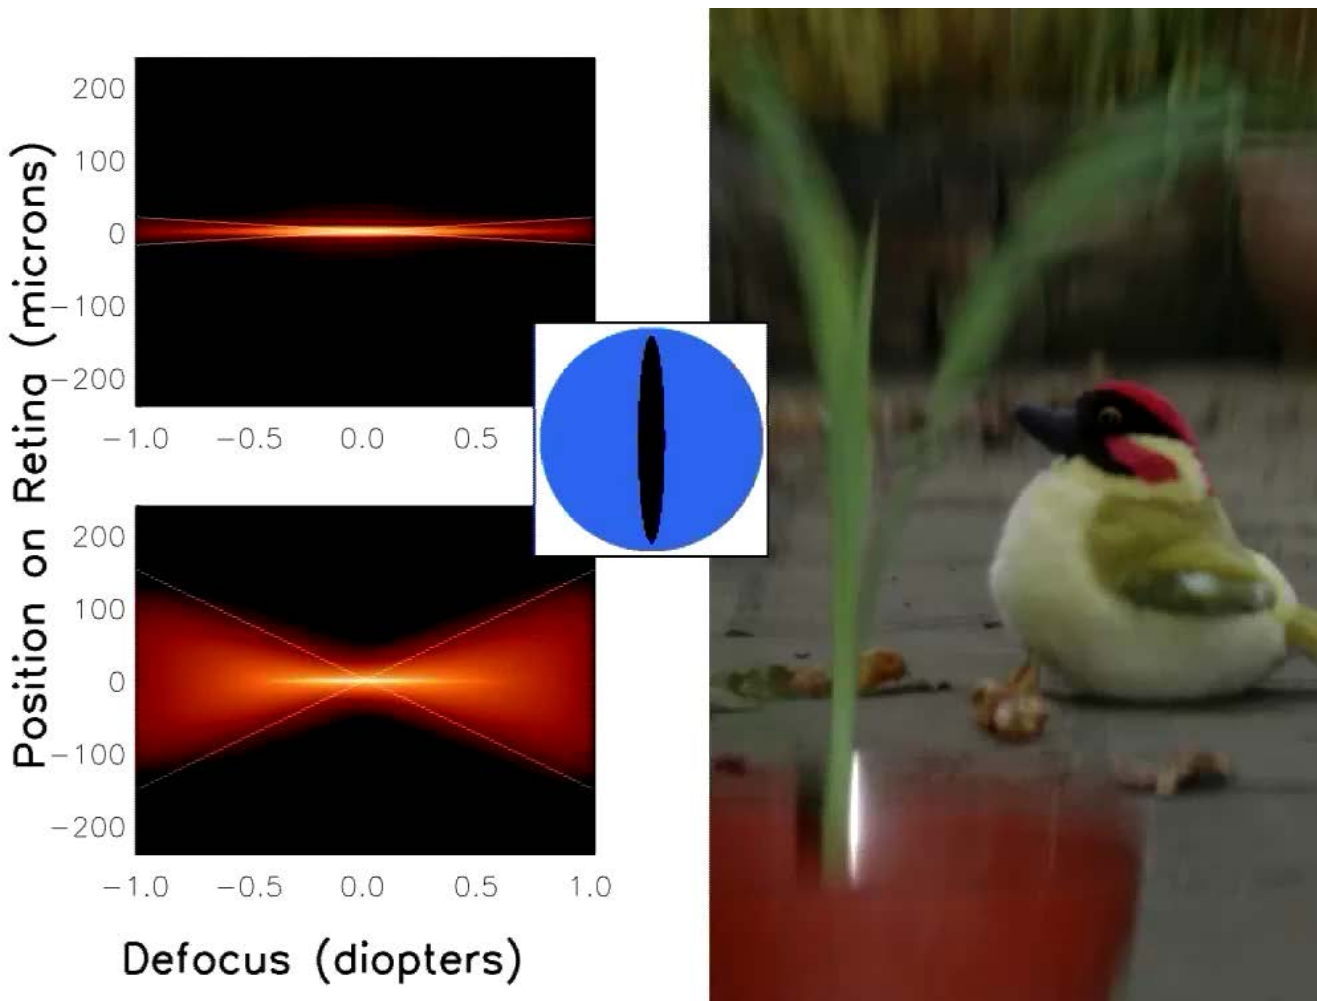

**Movie S2.** Video showing changes in image properties for different amounts of defocus and pupil orientations. Left: Cross-sections of PSFs as a function of focal distance for an eye with an elongated pupil (major axis of 12mm, minor axis of 1.5mm). The orientation of the pupil rotates from vertical to horizontal and back again. The object was white. The PSFs incorporate diffraction and chromatic aberration. Log amplitude is represented by brightness, brighter corresponding to high amplitude. Amplitudes lower than  $10^{-3}$  of the peak amplitude have been clipped. The upper panel shows horizontal cross-sections (relevant for imaging vertical contours) and the lower panel shows vertical sections (for imaging horizontals). The faint dashed white lines are from Eqns 3 and 4 and show that the equations are a good approximation to the PSF cross-sections. Right: Photograph of a depth-varying scene taken with a camera with a slit aperture that rotates from vertical to horizontal and back. The camera was focused on the toy bird. Objects nearer and farther than the bird are blurred, but the direction of greatest blur depends strongly on the orientation of the aperture. For example, when the aperture is vertical, near and far vertical contours are sharper than horizontal contours. When the aperture is horizontal, the opposite holds.
